# Supplementary material for: Evolutionary Analysis of the Steroidogenic Acute Regulatory Protein-Related Lipid Transfer Domain and Its Response to Salt Stress In Vitis Vinifera
Source: Research Square preprint supplement (doi:10.21203/rs.3.rs-399598/v1), 2021-04-20
Supplement: Supplementary file 1 [file 66bb73012708d8d124fff58e.xlsx]

## Sheet: 8-1
Gene	Start	End	Cis-acting elements
VvSTARD1	105	110	ABRE
VvSTARD1	789	796	ABRE
VvSTARD1	795	800	ABRE
VvSTARD1	868	877	ABRE
VvSTARD1	870	876	ABRE
VvSTARD1	871	876	ABRE
VvSTARD1	906	911	TGACG-motif
VvSTARD1	1250	1255	TGACG-motif
VvSTARD1	1388	1393	TGACG-motif
VvSTARD1	1623	1628	TGACG-motif
VvSTARD1	884	890	MBS
VvSTARD1	1104	1111	GARE-motif
VvSTARD1	45	55	TCA-element
VvSTARD1	906	911	CGTCA-motif
VvSTARD1	1250	1255	CGTCA-motif
VvSTARD1	1388	1393	CGTCA-motif
VvSTARD1	1623	1628	CGTCA-motif
VvSTARD2	109	114	ABRE
VvSTARD2	411	416	ABRE
VvSTARD2	582	587	ABRE
VvSTARD2	31	37	MBS
VvSTARD2	1747	1754	AuxRR-core
VvSTARD2	336	342	LTR
VvSTARD2	1741	1750	O2-site
VvSTARD3	267	273	MBS
VvSTARD3	334	340	MBS
VvSTARD3	778	787	TCA-element
VvSTARD3	879	888	TC-rich repeats
VvSTARD3	1375	1384	O2-site
VvSTARD4	1487	1493	MBS
VvSTARD4	1648	1654	MBS
VvSTARD4	61	66	CGTCA-motif
VvSTARD4	1394	1399	CGTCA-motif
VvSTARD4	61	66	TGACG-motif
VvSTARD4	1394	1399	TGACG-motif
VvSTARD4	288	295	P-box
VvSTARD5	574	580	TGA-element
VvSTARD5	876	881	CGTCA-motif
VvSTARD5	525	534	TCA-element
VvSTARD5	675	684	TCA-element
VvSTARD5	1024	1033	TCA-element
VvSTARD5	1340	1349	TCA-element
VvSTARD5	1651	1660	TCA-element
VvSTARD5	519	526	AuxRR-core
VvSTARD5	1781	1787	LTR
VvSTARD5	876	881	TGACG-motif
VvSTARD5	196	201	ABRE
VvSTARD6	234	240	MBS
VvSTARD6	921	927	MBS
VvSTARD6	1929	1935	MBS
VvSTARD6	827	833	TGA-element
VvSTARD6	1221	1227	TGA-element
VvSTARD6	1480	1491	AuxRE
VvSTARD6	1194	1199	ABRE
VvSTARD6	398	407	O2-site
VvSTARD6	1049	1058	O2-site
VvSTARD7	1481	1486	ABRE
VvSTARD7	675	681	LTR
VvSTARD7	488	497	TCA-element
VvSTARD7	1876	1882	MBS
VvSTARD7	1512	1519	AuxRR-core
VvSTARD7	946	955	O2-site
VvSTARD8	271	277	MBS
VvSTARD8	408	413	ABRE
VvSTARD8	815	820	ABRE
VvSTARD8	761	770	TC-rich repeats
VvSTARD9	791	800	TCA-element
VvSTARD9	1434	1443	TCA-element
VvSTARD9	32	41	O2-site
VvSTARD9	1193	1199	MBS
VvSTARD9	1847	1856	TC-rich repeats
VvSTARD9	445	452	TATC-box
VvSTARD9	1556	1563	P-box
VvSTARD9	129	134	ABRE
VvSTARD9	1571	1576	ABRE
VvSTARD9	43	48	CGTCA-motif
VvSTARD9	43	48	TGACG-motif
VvSTARD10	788	794	TGA-element
VvSTARD11	791	796	TGACG-motif
VvSTARD11	965	971	TGA-element
VvSTARD11	41	47	LTR
VvSTARD11	423	429	LTR
VvSTARD11	797	803	LTR
VvSTARD11	877	883	LTR
VvSTARD11	984	990	LTR
VvSTARD11	791	796	CGTCA-motif
VvSTARD11	630	639	TCA-element
VvSTARD11	188	197	TC-rich repeats
VvSTARD11	9	18	O2-site
VvSTARD12	1834	1840	MBS
VvSTARD12	392	401	TCA-element
VvSTARD12	1377	1386	TCA-element
VvSTARD12	155	162	AuxRR-core
VvSTARD12	505	511	TGA-element
VvSTARD13	1737	1744	AuxRR-core
VvSTARD13	441	450	O2-site
VvSTARD14	1686	1692	MBS
VvSTARD14	901	910	TCA-element
VvSTARD14	733	738	CGTCA-motif
VvSTARD14	1233	1238	CGTCA-motif
VvSTARD14	1144	1153	TC-rich repeats
VvSTARD14	1975	1984	TC-rich repeats
VvSTARD14	733	738	TGACG-motif
VvSTARD14	1233	1238	TGACG-motif
VvSTARD15	1762	1767	CGTCA-motif
VvSTARD15	1762	1767	TGACG-motif
VvSTARD15	200	209	TC-rich repeats
VvSTARD15	683	689	TGA-element
VvSTARD16	343	348	TGACG-motif
VvSTARD16	1549	1554	TGACG-motif
VvSTARD16	1650	1655	TGACG-motif
VvSTARD16	1711	1716	TGACG-motif
VvSTARD16	411	416	ABRE
VvSTARD16	495	500	ABRE
VvSTARD16	1597	1606	ABRE
VvSTARD16	343	348	CGTCA-motif
VvSTARD16	1549	1554	CGTCA-motif
VvSTARD16	1650	1655	CGTCA-motif
VvSTARD16	1711	1716	CGTCA-motif
VvSTARD17	1039	1046	P-box
VvSTARD17	1058	1067	TCA-element
VvSTARD17	1367	1376	TCA-element
VvSTARD17	76	81	CGTCA-motif
VvSTARD17	383	388	CGTCA-motif
VvSTARD17	1081	1086	ABRE
VvSTARD17	219	225	TGA-element
VvSTARD17	194	200	MBS
VvSTARD17	262	268	MBS
VvSTARD17	452	458	MBS
VvSTARD17	533	539	MBS
VvSTARD17	751	757	MBS
VvSTARD17	76	81	TGACG-motif
VvSTARD17	383	388	TGACG-motif
VvSTARD17	931	937	LTR
VvSTARD18	1523	1530	P-box
VvSTARD18	722	727	TGACG-motif
VvSTARD18	735	740	TGACG-motif
VvSTARD18	775	781	TGA-element
VvSTARD18	722	727	CGTCA-motif
VvSTARD18	735	740	CGTCA-motif
VvSTARD18	1825	1830	ABRE
VvSTARD19	125	131	MBS
VvSTARD19	1809	1815	MBS
VvSTARD19	1033	1042	TC-rich repeats
VvSTARD19	557	564	P-box
VvSTARD19	1171	1178	TATC-box
VvSTARD19	1287	1294	TATC-box
VvSTARD19	1642	1647	ABRE
VvSTARD19	1600	1609	O2-site
VvSTARD20	147	153	LTR
VvSTARD20	1339	1345	LTR
VvSTARD20	1470	1476	TGA-element
VvSTARD20	761	766	TGACG-motif
VvSTARD20	761	766	CGTCA-motif
VvSTARD20	32	37	ABRE
VvSTARD20	507	512	ABRE
VvSTARD20	749	754	ABRE
VvSTARD20	1139	1144	ABRE
VvSTARD20	1318	1325	AuxRR-core
VvSTARD21	410	415	TGACG-motif
VvSTARD21	586	591	TGACG-motif
VvSTARD21	336	341	ABRE
VvSTARD21	921	926	ABRE
VvSTARD21	1973	1978	ABRE
VvSTARD21	410	415	CGTCA-motif
VvSTARD21	586	591	CGTCA-motif
VvSTARD21	1591	1600	TC-rich repeats
VvSTARD21	1005	1014	TCA-element
VvSTARD21	1035	1044	TCA-element
VvSTARD21	1101	1110	TCA-element
VvSTARD21	843	850	P-box
VvSTARD21	185	192	AuxRR-core
VvSTARD21	795	804	O2-site
VvSTARD22	1659	1666	AuxRR-core
VvSTARD22	50	56	TGA-element
VvSTARD22	1452	1458	TGA-element
VvSTARD22	1947	1952	CGTCA-motif
VvSTARD22	1724	1731	GARE-motif
VvSTARD22	1947	1952	TGACG-motif
VvSTARD22	723	729	MBS
VvSTARD23	1781	1786	ABRE
VvSTARD23	972	979	P-box
VvSTARD23	930	936	MBS
VvSTARD23	251	258	GARE-motif
VvSTARD23	432	441	TCA-element
VvSTARD23	895	904	TCA-element
VvSTARD23	628	637	O2-site

## Sheet: 8-2
Gene	Tendril - Young	Tendril - Well Developed	Tendril - Fruit Set	Leaf - Young	Leaf - Fruit Set	Leaf - Senescent	Seedling	Stem - Young	Stem - Mature (Woody)	Bud - Bud Swelling Stage	Bud - Bud Burst Initial Stage	Bud - Bud Burst Later Stage	Bud - Latent Bud	Bud - Winter Dormant	Bud - Winter Dormant	Flower - Young	Flower - Well Developed	Flower - Start of Flowering	Flower - Flowering	Root	Carpel	Stamen	Petals	Pollen	Rachis - Fruit Set	Seed - Fruit Set	Pericarp - Fruit Set	Rachis - Post Fruit Set	Pericarp - Post Fruit Set	Seed - Post Fruit Set	Flesh - Post Fruit Set	Skin - Post Fruit Set	Seed - Veraison	Pericarp - Veraison	Flesh - Veraison	Skin - Veraison	Rachis - Veraison	Rachis - Mid Ripening	Seed - Mid Ripening	Pericarp - Mid Ripening	Flesh - Mid Ripening	Skin - Mid Ripening	Rachis - Ripening	Pericarp - Ripening	Flesh - Ripening	Skin - Ripening	Flesh - PHWI	Flesh - PHWII	Flesh - PHWIII
VvSTARD1	57.03	25.11	18.58	88.84	25.12	16.95	57.17	20.99	6.08	121.38	236.93	195.15	178.08	36.01	36.01	137.43	100.26	43.31	41.32	4.02	72.2	45.24	57.12	82.77	28.01	169.04	55.41	15.47	14.48	47.25	6.73	69.8	22.34	6.92	4.9	18.05	7.34	8.81	22.34	16.25	3.66	16.81	6.06	8.83	6.68	13.92	6.32	3.49	3.53
VvSTARD2	2.85	3.81	3.04	2.44	2.87	11.63	3.2	2.49	4.37	1.88	1.93	2.55	2.46	4.23	4.23	2.31	3.15	3.05	2.96	3.04	2.35	2.34	2.39	4.22	2.54	3.61	2.81	2.02	4.91	52.27	2.62	4.84	5.08	3.04	1.89	3.06	2.15	1.67	5.08	5.68	1.88	2.56	1.77	7.41	4.75	6.83	5.73	2.98	2.35
VvSTARD3	209.89	198.05	134.53	367.26	370.86	395.29	302.29	119.63	543.91	516.99	404.79	231.84	384.57	402.84	402.84	422.26	301.29	283.54	242.95	206.46	246.75	184.69	257.83	72.39	195.14	359.03	286.02	202.43	239.45	248.89	149.45	283.31	325.94	175.68	164.82	234.39	330.23	222.27	325.94	365.56	171.83	264.55	321.58	191.68	262.78	316.48	737.3	739.82	476.17
VvSTARD4	98.58	69.56	45.26	206.79	134.38	99.74	286.53	27.04	7.4	632.39	580.15	454.11	680.17	305.37	305.37	377.26	362.46	156.33	92.22	6.4	269.1	117.45	177.94	42.29	70.26	511.9	146.99	71.7	50.5	437.6	17.74	214.6	330.36	40.34	15.33	146.88	44.46	43.46	330.36	19.31	12.99	224.42	41.71	72.82	21.22	106.21	16.44	13.12	13.66
VvSTARD5	42.96	40.95	11.26	173.18	84.48	30.36	127.39	18.25	5.34	195.83	300.68	252.26	151.47	111.33	111.33	220.2	302.07	142.83	93.28	5.04	255.28	58.86	166.69	35.02	30.76	680.06	221.04	26.11	57.11	231.07	16.05	202.19	101.92	30.87	8.94	92.37	33.66	24.95	101.92	18.1	6.52	99.51	26.97	29.16	6.23	66.69	8.65	6.26	7.43
VvSTARD6	272.14	200.11	167.08	313.93	185.91	159.81	300.32	117.74	108.75	521.79	445.35	399.66	517.49	197.45	197.45	416.84	346.31	235.01	172.42	28.5	175.73	53.01	221.46	54.3	170.16	219.39	245.94	186.01	157.15	64.65	27.35	347.17	100.8	142.31	31.09	374.45	166.97	156.32	100.8	131.93	33.2	384.85	139	266.67	35.39	284.05	23.64	20.74	23.29
VvSTARD7	22.67	11.75	22.52	7.28	14.17	30.37	12.23	12.24	8.8	19.33	14.37	26.01	45.28	25.21	25.21	38.14	30.91	8.37	10.36	6.28	17	5.52	21.07	16.48	32.91	17.59	55.26	22	24.26	189.26	8.75	55.72	19.72	7.06	4.1	20.35	10.76	9.72	19.72	9.33	3.33	12.48	11.2	8.26	10.19	16.08	7.07	12.93	13.49
VvSTARD8	50.91	40.37	36.45	45.38	42.22	36.91	42.58	21.15	11.32	71.23	203.61	155.28	204.8	40.84	40.84	61.41	79.87	20.19	21.15	25.35	71.83	33.33	36.44	19.98	20.95	108.58	44.91	13.2	21.65	43.84	12.93	57.97	31.6	15.06	11.46	36.57	24.64	13.94	31.6	15.86	11.4	30.73	14.96	35.27	23.01	49.64	23.94	10.46	11.99
VvSTARD9	144.71	91.72	142.29	54.87	60.35	38.85	67.67	140.5	305.31	134.66	113.42	119	119.38	173.05	173.05	105.92	67.92	35.29	28.75	61.45	71.65	17.59	28.44	11.21	265.69	36.16	70.65	214.48	52.88	14.66	61.29	26.89	51.54	54.31	62.22	24.83	174.91	82.92	51.54	26.21	44.79	23.6	139.26	61.05	38.55	31.49	40.34	39.36	34.7
VvSTARD10	256.42	299.54	313.3	99.72	65.16	35.88	210.82	376.45	126.11	351.01	291.57	178.67	232.49	159.14	159.14	262.98	197.24	115.42	119.42	171.67	237.24	47.14	97.2	21.87	351.6	140.44	252.33	340	149.91	61.9	194.03	90.26	32.77	114.88	101.05	85.4	107.61	162.29	32.77	39.47	152.72	87.64	147.71	114.78	108.91	93.09	70.2	70.54	98.02
VvSTARD11	545.89	635.35	664.01	238.89	73.86	28.55	444.63	884.42	609.28	650.2	586.81	610.72	641.03	540.62	540.62	738.69	360.36	322.95	321.56	313.59	370.49	183.84	214.37	35.22	573.15	245.95	195.96	619.13	91.42	146.91	204.52	157.61	355.49	76.09	84.17	55.7	225.53	223.96	355.49	31.84	77.11	59.84	290.47	53.6	60.34	56.79	87.86	87.42	106.37
VvSTARD12	384.78	333.33	241.77	200.78	50.85	20.24	322.62	437.68	120.19	706.11	667.94	665.33	723.58	112.4	112.4	604.82	382.52	120.65	98.23	186.98	340.47	199.84	70.57	46.39	500.37	142.77	230.02	517.84	99.55	335.98	223.62	61.2	42.96	43.45	38.82	26.22	73.73	110.92	42.96	21.96	33.16	31.82	102.45	19.49	15.2	15.27	12.78	20.13	19.63
VvSTARD13	47.79	42.36	37.31	40.45	37.89	29.67	65.56	40.72	119.22	111.59	68.66	58.31	46.65	82.27	82.27	67.88	40.1	30.03	22.86	36.48	39.1	16.62	21.96	5.35	52.02	26.17	30.79	43.39	28.26	123.15	26.78	25.46	39.69	25.78	29.02	24.04	36.59	34.56	39.69	24.26	34.51	32.93	38.71	31.31	29.49	32.11	38.4	37.38	39.31
VvSTARD14	124.97	148.03	130.98	70.32	44.45	67.46	53.8	243.39	83.02	90.9	177.51	96.46	120.36	22.89	22.89	137.04	107.88	92.98	89.96	122.05	154.93	102.87	37.14	336.4	249.24	94.14	195.43	252.99	173.03	256.07	347.92	169.3	53.35	222.09	235.77	131.19	110.93	132.95	53.35	106.03	229.68	143.84	132.07	123.35	138.34	95.37	150.27	170.87	137.55
VvSTARD15	124.97	148.03	130.98	70.32	44.45	67.46	53.8	243.39	83.02	90.9	177.51	96.46	120.36	22.89	22.89	137.04	107.88	92.98	89.96	122.05	154.93	102.87	37.14	336.4	249.24	94.14	195.43	252.99	173.03	256.07	347.92	169.3	53.35	222.09	235.77	131.19	110.93	132.95	53.35	106.03	229.68	143.84	132.07	123.35	138.34	95.37	150.27	170.87	137.55
VvSTARD16	115.77	110.55	87.13	66.08	61.38	33.01	98.27	122	102.03	101.78	112.55	82.18	113.14	70.01	70.01	99.88	88.14	103.86	98.63	92.71	88.82	114.34	90.71	116.49	117.13	114.01	107.95	115.38	107.81	128.23	143.89	124.88	88.45	125.17	191.74	136.42	116.51	124.88	88.45	135.29	175.22	145.69	133.77	105.35	145.12	99.62	142.89	166.84	104.16
VvSTARD17	12.34	17.59	12.58	8.1	17.32	7.93	12.06	16.67	17.35	24.66	24.54	13.54	24.64	11.7	11.7	17.34	16.63	19.98	15.74	16.02	22.25	23.73	23.22	16.88	20.47	18.71	22.99	27.19	11.16	29.2	31.86	13.23	25.21	26.14	34.57	25.51	27.78	29.24	25.21	9.89	54.85	32.72	28.95	11.94	33.44	26.12	30.29	45.42	30.64
VvSTARD18	124.97	148.03	130.98	70.32	44.45	67.46	53.8	243.39	83.02	90.9	177.51	96.46	120.36	22.89	22.89	137.04	107.88	92.98	89.96	122.05	154.93	102.87	37.14	336.4	249.24	94.14	195.43	252.99	173.03	256.07	347.92	169.3	53.35	222.09	235.77	131.19	110.93	132.95	53.35	106.03	229.68	143.84	132.07	123.35	138.34	95.37	150.27	170.87	137.55
VvSTARD19	15.31	19.63	23.06	11.74	21.61	15.93	13.69	20.73	41.26	28.79	14.69	23.04	19.59	21.49	21.49	10.12	17.75	36.89	37.09	24.6	28.5	59.27	24.3	313.23	24.11	26.62	21.06	23.56	19.62	30.7	20.89	15.97	33.23	43.65	51.7	39.86	34.03	38.46	33.23	37.99	73.22	60.62	36.25	45.28	81.34	60.85	75.57	112.01	97.4
VvSTARD20	568.92	434	564.57	752.21	766.38	443.12	531.51	535.69	304.29	272.68	331.94	493.19	383.45	360.88	360.88	630.23	534.4	426.41	425.63	219.72	471.47	432.23	600.47	784.14	405.81	295.33	546.57	569.8	466.37	221.86	411.3	363.11	373.21	287.82	162.92	201.07	303.38	398.24	373.21	247.99	248.25	254.66	398.27	304.03	304.28	310.62	350.92	356.25	430.82
VvSTARD21	577.32	557.08	384.97	614.64	512.68	370.96	579.73	406.02	466.37	388.85	694.32	502.16	587.92	400.12	400.12	672.87	575.86	546.78	513.47	631.3	537.84	493.29	419.13	818.17	493	587.72	600.83	526.67	773.33	553.47	600.87	725.45	558.75	585.83	563.06	541.44	424.95	614.97	558.75	479.38	514.4	586	538.16	525.59	517.32	573.35	492.28	463.09	384.29
VvSTARD22	130.62	156.59	226.94	190.31	240.33	95.96	256.15	142.28	315.37	281.6	107.08	69.18	171.05	409.55	409.55	195.13	151.32	189.92	170.02	212.95	208.12	201.86	232.76	339.03	167.27	190.47	171.52	208.24	248.22	246.68	233.95	276.95	316.38	285.11	301.2	355.32	195.29	336.25	316.38	211.56	303.45	383.54	298.71	296.77	300.54	269.27	331.81	308.72	348.32
VvSTARD23	149.74	229.73	117.02	66.23	16.95	21.24	291.92	134.66	30.41	34.39	62.89	73.3	83.91	24.16	24.16	102.96	63.63	380.36	477.56	33.33	192.74	63.98	95.55	102.85	27	53.5	135.38	23.66	19.54	33.13	17.69	77.77	181.34	88.69	136.54	117.25	22.54	15.98	181.34	76.87	126.93	118.03	26.21	126.92	210.42	215.58	133.51	103.17	83.5
[truncated: 6 more columns]

## Sheet: 8-3
Gene	CK	1h-Salt	1h-PEG	1h-Cold	4h-Salt	4h-PEG	4h-Cold	8h-Salt	8h-PEG	8h-Cold	24h-Salt	24h-PEG
VvSTARD1	95.8943	65.509	70.4167	101.144	110.378	85.4547	94.0013	107.957	119.993	87.423	65.73	95.5547
VvSTARD2	95.8943	65.509	70.4167	101.144	110.378	85.4547	94.0013	107.957	119.993	87.423	65.73	95.5547
VvSTARD3	197.867	229.467	277.143	198.367	201.563	206.733	210.707	164.147	158.83	187.413	278.497	360.797
VvSTARD4	40.4397	27.693	24.2603	31.8803	27.454	23.1563	25.3287	25.049	29.4433	25.433	16.219	24.1617
VvSTARD5	40.4397	27.693	24.2603	31.8803	27.454	23.1563	25.3287	25.049	29.4433	25.433	16.219	24.1617
VvSTARD6	3.29837	3.01807	3.35993	10.4757	2.2651	3.1846	8.78607	12.5674	7.10093	2.90583	2.6056	6.27547
VvSTARD7	40.4397	27.693	24.2603	31.8803	27.454	23.1563	25.3287	25.049	29.4433	25.433	16.219	24.1617
VvSTARD8	455.643	572.197	676.323	413.593	350.75	341.137	512.203	277.92	262.643	413.81	336.227	435.61
VvSTARD9	369.257	345.46	366.31	372.06	363.7	331.147	409.737	326.533	308.89	427.113	444.317	469.397
VvSTARD10	347.89	297.347	379.6	358.987	347.537	353.817	364.347	350.437	330.53	286.797	571.563	531.94
VvSTARD11	369.257	345.46	366.31	372.06	363.7	331.147	409.737	326.533	308.89	427.113	444.317	469.397
VvSTARD12	649.26	572.38	682.303	662.19	650.56	668.903	688.443	580.527	534.753	645.343	714.583	632.19
VvSTARD13	347.89	297.347	379.6	358.987	347.537	353.817	364.347	350.437	330.53	286.797	571.563	531.94
VvSTARD14	2061.77	1957.8	1869.2	2113.53	1968.03	1868.77	1807.93	1972.63	2058.87	2067.87	1795.83	1544.53
VvSTARD15	17.77	19.4293	16.8647	20.764	14.7293	12.7273	19.1863	23.1747	21.7937	16.004	18.0397	22.7793
VvSTARD16	21.952	15.2373	15.2826	34.4347	24.658	27.1657	36.5433	43.7573	30.8207	33.2343	28.7057	17.9387
VvSTARD17	366.02	255.973	269.86	403.793	249.913	263.163	258.697	295.79	296.09	303.023	201.803	206.58
VvSTARD18	53.3473	49.725	45.4713	42.1703	51.977	37.6803	27.5033	38.642	44.0317	37.1073	39.25	47.6747
VvSTARD19	10.0305	12.8646	8.65773	7.934	6.703	4.21643	7.5825	6.7784	5.69813	8.58797	7.1494	7.1243
VvSTARD20	2701.33	3345.47	3505.03	2583.2	2481.13	2593.57	2577.23	2274.9	2318.77	2476.37	2307.87	2994.8
VvSTARD21	1123	944.837	1027.63	1235.47	963.217	887.463	1023.68	988.99	1035.43	1148	974.207	1048.6
VvSTARD22	342.553	327.447	343.733	311.617	341.46	316.13	349.343	323.947	372.543	355.697	545.313	666.25
VvSTARD23	28.8657	28.429	29.01	35.921	31.6073	24.751	23.1033	32.323	41.2267	31.5837	24.8893	31.8107

## Sheet: 8-4
Gene	Dry seed	Imbibed seed, 24 h	1st Node	Flower Stage 12, Stamens	Cauline Leaf	Cotyledon	Root	Entire Rosette After Transition to Flowering	Flower Stage 9	Flower Stage 10/11	Flower Stage 12	Flower Stage 15	Flower Stage 12, Carpels	Flower Stage 12, Petals	Flower Stage 12, Sepals	Flower Stage 15, Carpels	Flower Stage 15, Petals	Flower Stage 15, Sepals	Flower Stage 15, Stamen	Flowers Stage 15, Pedicels	Leaf 1 + 2	Leaf 7, Petiole	Leaf 7, Distal Half	Leaf 7, Proximal Half	Hypocotyl	Rosette Leaf 2	Rosette Leaf 4	Rosette Leaf 6	Rosette Leaf 8	Rosette Leaf 10	Rosette Leaf 12	Senescing Leaf	Shoot Apex, Inflorescence	Shoot Apex, Transition	Shoot Apex, Vegetative	Stem, 2nd Internode	Mature Pollen	Seeds Stage 3 w/ Siliques	Seeds Stage 4 w/ Siliques	Seeds Stage 5 w/ Siliques	Seeds Stage 6 w/o Siliques	Seeds Stage 7 w/o Siliques	Seeds Stage 8 w/o Siliques	Seeds Stage 9 w/o Siliques	Seeds Stage 10 w/o Siliques	Vegetative Rosette
AtSTARD1	32.69	79.94	21.56	34.43	51.9	59.25	16.98	74.41	81.1	65.58	55.71	50.83	121.43	69.05	24.83	86.41	73.1	30.03	25.13	56.6	79.36	44.15	44.68	40.81	49.55	48.48	43.41	55.16	55.18	61.26	73.88	78.48	109.93	125.15	124	42.65	35.33	50.98	202.8	207.21	137.55	113.26	58.31	58.75	47.16	103.81
AtSTARD2	9.04	25.61	6.43	19.26	7.48	9.81	8.78	18.46	35.29	32.5	30.13	12.26	53.26	16.9	10.26	22.5	10.91	7.55	16.78	12.68	13.51	9.15	8.65	11.45	8.86	9.41	9.28	12.38	13.16	13.86	19.13	11.63	44.23	58.9	41	5.28	26.86	9.58	14.23	25.39	24.48	27.08	11.36	17.48	15.3	16.16
AtSTARD4	2.39	1.4	1.91	3.3	3.6	8.51	10.43	6.53	4.65	1.03	4	4.41	6.15	5.46	2.73	1.65	4.51	2.48	5.38	5.73	7.7	4.7	5.91	6.75	9.5	4.88	3.86	13.26	3.23	5.48	9.11	8.5	4.89	5.35	5.43	6.68	14.44	12.1	6.43	5.55	10.56	3.9	4.18	11.25	5.51	6.63
AtSTARD6	10.83	17.01	8.71	12.55	20.43	14.81	11.21	20.38	36.76	48.86	34.01	18.59	45.55	28.85	18.51	20.76	15.75	22.25	20.58	18.61	19.11	13.63	11.7	11.38	17.58	14.94	14.7	21.45	14.55	19.48	17.73	14.35	52.06	54.88	55.28	12.31	20.11	12.46	20.65	24.89	42.13	26.05	19.46	17.11	26.21	40.68
AtSTARD7	5.97	32.68	2.71	6.4	11.36	2.71	41.21	25.31	9.23	4.86	7.75	6.31	6.13	16.5	4.18	19.66	4.28	6.35	10.41	2.08	7.16	3.83	1.13	1.53	10.04	3.1	4.41	4.61	2.93	15.23	39.58	6.2	21	75.5	74.39	0.88	2.31	56.5	895.95	628.56	334.15	341.1	123.26	164.33	76.01	89.46
AtSTARD8	3.3	4.09	1.25	1.91	6.21	5.4	3.11	2.23	2.23	2.48	2.01	1.91	1.9	4.68	1.78	10.35	2.83	2.16	1.75	3.79	2.83	2.16	2.05	2.51	1.93	4.58	2.06	4.7	3.91	3.56	5.25	7.8	4.13	2.21	3.06	2.71	11.38	16.18	270.88	64.89	25.43	3.38	7.23	7.61	7.16	3.79
AtSTARD10	1.38	1.32	0.78	2.71	1.28	1.73	1.48	1.28	0.75	0.76	1.28	1.3	1.75	3.3	1.04	1.43	1.33	1.88	2.43	1.76	2.03	1.26	1.86	1.4	1.36	1.6	1.3	1.18	1.11	1.71	1.45	0.91	0.98	0.98	1.91	1.09	2.75	2.71	16.78	1.45	1.48	2.19	1.29	1.91	2.46	1.5
AtSTARD11	43.7	47.82	44.41	38.98	91.76	49.95	13.88	60.95	111.51	118.35	75.8	58.48	108.95	20.1	60.3	105.51	6.61	26.45	84.86	117.75	67.98	52.18	59.25	64.66	44.21	41.21	53.33	56.83	66.36	74.41	83.05	53.34	100.41	77.73	68.83	58.71	9.55	61.41	65.64	74.23	86.33	66.48	41.9	55.13	31.48	100.59
AtSTARD12	119.42	339.82	49.83	22.4	215.9	104.44	66.9	106.78	66.5	56.15	46.13	65.46	52.08	80.38	43.93	70	174.21	53.1	102.66	76.83	90.1	68.26	97.26	95.3	59.83	108.61	103.38	95.45	86.84	102.26	129.86	220.18	69.14	99.9	99.73	109.28	9.66	55.08	136.41	185.33	246.15	230.78	130.33	136.15	137.85	156.11
AtSTARD13	186.11	524.2	41.35	89.1	133.65	150.76	19.63	199.1	433.5	486.9	335.93	247.73	574.6	434.41	158.71	398.46	296.88	46.06	131.61	147.98	187.73	106.08	134.1	132.36	88.45	77.1	124.63	112.96	135.01	138.01	175.48	97.73	515.28	409.95	387.2	62.71	13.13	169.11	221	346.58	563.86	502.08	276.48	226.38	214.53	351.76
AtSTARD14	9.24	3.85	12.1	15.31	28.63	27.05	11.71	20.51	12.23	11.88	9.45	11.95	15.2	6.28	10.2	6.68	5.71	21.65	6.5	16.6	36.19	15.7	19.76	18.96	17.43	24.31	23.28	30.75	22.55	21.88	28.81	22.7	11.13	12.08	12.03	21.11	64.05	10.5	10.98	8.21	17.58	19.01	24.88	27.98	19.11	11.71
AtSTARD15	269.73	388.29	37.61	88.9	99.9	151.26	23.85	166.46	375.48	393.53	312.58	199.8	584.61	413.13	137.3	472.36	204.48	38.73	124.58	114.06	216.56	97.81	125.18	113.26	83.68	75.06	96.01	112.35	120.66	144.51	172.71	58.84	474.48	499.28	424.68	61.7	15.21	162.33	275.34	256.5	317.25	294.48	146.81	148.28	166.88	334.66
AtSTARD16	3.72	7.65	5.6	15.2	9.76	11.26	12.73	10.61	8	7.48	12.61	12.96	7.9	8.9	8.73	19.11	7.75	12.46	11.61	12.11	15.16	10.53	7.56	9.53	13.81	12.06	11.78	12.48	9.16	12.25	11.93	9.81	11.4	12.05	13.35	8.06	43.58	25.58	24.08	11.06	7.93	8.96	19.35	27.4	20.18	10.31
AtSTARD18	3.58	14.51	8.68	14.48	11.51	13.96	6.93	11.33	10.03	10.41	12.15	8.2	9.98	10.21	9.63	9.23	10.53	11.55	4.43	12.23	17.7	11.03	11.36	10.94	9.85	9.01	11.21	15.18	12.18	14.6	18.15	10.16	13.65	8.28	7.91	12.41	29.81	17.98	34.3	19.08	16.98	6.03	12.56	7.86	9.08	11.83
AtSTARD19	8.76	31.91	10.86	11.33	17.25	23.28	8.33	31.23	52.26	47.8	44.63	23.85	61.81	35.88	14.71	48.7	8.43	12.46	13.26	25.38	38	25.6	26.78	32.28	16.91	21.24	20.06	33.96	30.93	46.7	43.3	11.68	72.05	63.71	77.45	15	38.98	22.78	77.5	116.01	136.81	115.61	43.43	37.18	29.98	60.56
AtSTARD20	1.99	1.77	1.73	1.61	3.71	2.26	15.56	2.46	17.09	1.8	5.9	1.76	2.05	1.09	1	3.16	0.93	0.7	1.3	4.73	2.95	3.9	2.95	4.89	1.46	1.66	1.78	1.56	2.79	2.26	4.76	0.98	12.46	2.95	2.48	1.61	2.56	2.76	10.16	9.31	1.61	1.96	1.58	2.3	2.23	2.8
AtSTARD3	29.68	56.51	305.03	132.93	201.23	58.75	119.13	107.71	260.09	253.48	154.88	155.98	162.26	132.95	90.26	194.08	213.76	141.29	114.78	80.8	73.36	126.08	85.96	88.56	214.75	91.36	83.73	93.2	95.95	83.78	87.68	230.05	364.68	283.83	211.85	227.81	18.98	114.43	184.6	152.24	115.33	84	60.35	69.48	47.85	103.85
AtSTARD5	9.83	52.93	772.83	23.53	114.6	39.3	266.56	159.53	171.05	153.11	131.91	101.71	162.21	49.91	47.75	133.53	38.38	30.11	35.6	258.11	65.28	209.36	52.01	76.3	368.53	65.08	79.2	94.83	100	102.63	113.93	94.06	231.33	343.05	290.93	698.46	13.33	69.26	47.26	44.2	50.88	44.84	30.86	24.68	35.55	144.08
AtSTARD9	34.71	86.56	172.28	29.65	60.21	59.06	130.98	81.38	137.28	130.5	119.3	88.81	156.03	46.06	40.81	129.51	43.2	21.18	28.53	91.8	75.55	83.28	44.58	51.58	225.71	44.95	48.38	59.13	59	65.51	78.21	24.68	207.51	157.16	170.48	176.18	25.6	78.05	123.55	117.86	137.06	115.13	89.68	65.6	52.08	106.51
AtSTARD17	1.86	31.52	214.56	22.71	52.9	20.28	110.26	52.86	87.21	77.36	57.28	43.06	60.46	34.61	28.4	62.73	3	3.98	8.11	48.35	37.01	81.05	26.06	29.29	227.6	14.56	38.03	44.18	44.53	56.66	58.56	21.55	73.98	48.71	77.05	187.88	4.53	48.98	27.6	20.16	22.68	20.8	16.21	18.46	4.1	56.93
AtSTARD21	75.91	228.48	536.41	37.55	123.66	55.41	197.9	183.08	385.73	344.66	311.61	302.84	502.75	115.26	104.63	474.48	58.36	35.29	36.03	258.21	80.93	142.73	53.65	64.66	297.01	43.13	79.45	96.8	90.81	112.25	144.68	59.13	575.28	548.54	375.38	455.66	2.56	243.16	332.18	264.46	300.66	248.98	54.73	56.58	43.6	171.88
AtSTARD22	16.41	73.84	126.88	189.31	110.91	74.91	69.95	71.16	96.83	110.93	114.33	147.66	87.48	157.63	106.28	75.56	278.18	227.88	224.76	66.21	67.23	64.1	86.81	74.28	119.84	89.13	85.05	89.63	73.96	68.11	64.05	184.31	85.21	83.5	71.05	147.58	612.36	68.13	83.56	82.4	68.51	60.63	46.01	60.45	47.4	57.38
AtSTARD23	7.14	6.13	7.43	898.38	4.91	6.45	8.05	7.1	5.63	8.73	90.8	360.53	12.46	42.84	25.76	79.7	76.36	70.38	1540.06	17.09	10.93	6.9	7.68	9.61	6.5	9.31	11.35	14.1	9.1	12.95	11.03	14.36	6.53	5.23	8.33	6.53	8158.08	358.41	29.85	30.8	12.93	11.6	8.78	13.06	20.01	8
AtSTARD24	116.9	199.47	185.83	355.73	205.78	150.01	128.65	144.56	137.66	153.43	197.53	258.09	177.26	194.08	223.45	173.78	344.01	319.16	489.86	150.25	131.06	124.36	121.21	123.45	169.95	184.71	133.93	129.13	114.4	113.46	118.91	357.33	130.79	185.65	136.06	255.83	696.36	145.5	158.53	168.73	133.28	132.46	117.21	104.83	106.16	137.73
AtSTARD26	2.5	18.85	66.14	118	19.63	15.38	71	31.8	74.14	54.75	62.33	23.81	85.76	62.06	20.46	60.91	13.88	10.76	13.73	39.65	22.26	34.1	23.45	22.03	51.28	9.61	21.56	17.84	26.25	24.93	27.41	7.3	85.1	84.7	52.23	46.53	39.76	50.81	30.53	25.01	34.91	33.85	16.5	20.36	17.38	31.8
AtSTARD25	74.78	128.54	304.09	643.19	246.66	187.78	186.21	255.58	350.88	412.96	390.73	357.46	339.23	562.71	225.83	339.9	521.55	282.11	582.19	265.48	159.18	220.51	197.06	186.15	335.61	238.51	232.38	230.88	191.66	187.93	155.21	283.88	252.73	262.34	261.01	298.46	478.55	304.4	182.78	154.98	109.21	109.9	109.9	104.96	108.53	200.86
AtSTARD27	168.98	66.22	210.55	201.71	365.39	279.84	49.08	212.36	78.18	137.71	128.06	225.06	57.55	73.93	214.01	69.41	449.16	358.01	407.25	232.26	280.38	74.08	104.06	80.23	129.44	256.45	182.4	130.25	66.56	70.73	56.76	366.46	52.41	41.31	55.61	210.01	204.38	158.03	158.78	123.7	115.66	169	259.95	318.58	287.18	139.33
AtSTARD28	950.01	1163.47	920.83	155.76	2235.31	3200.35	294.08	2686.71	794.53	1001.46	791.71	891.81	673.06	689.68	1325.88	937.68	730.83	664.31	730.66	1965.03	2741	1964.13	3116.86	2780.83	1207.96	2799.91	2903.19	2651.5	2462.63	2117.53	1735.81	891.31	669.73	856.61	764.61	1921.55	86.25	1155.55	699.68	690.06	587.06	461.3	1291.36	1212.88	1170.55	1739.53
AtSTARD29	46.28	50.33	107.56	28.31	744.38	311.28	68.56	227.86	59.03	80.08	81.25	122.3	63.43	46.93	194.86	63.81	87.8	282.63	70.2	121.93	86.16	144.95	265.61	188.6	86.68	517.1	346.39	250.71	169.78	140.33	98.63	435.2	78.55	74.68	56.55	339.08	17.45	58.9	95.16	91.33	60.2	54.79	40.43	57.16	64.46	74.28
AtSTARD30	57.35	81.62	251.61	52.1	181.41	248.83	63.05	267.58	102.96	130.36	102.26	199.78	106.76	113.75	238.11	253.55	214.35	120.53	100.85	307.76	382.75	178.33	259.11	206.85	167.43	231.65	200.8	211.01	206.69	225.33	214.03	62.18	45.98	56.16	90.93	278.31	39.25	312.95	151.03	182.75	85.93	74.26	98.65	85.23	91.01	405.4
AtSTARD31	728.46	235.71	294.09	384.31	249.65	238.61	307.11	252.8	312.7	356.7	379.83	333.76	434.38	437.08	335.63	371.23	416.91	280.58	423.86	467.51	330.36	358	368.63	363.89	403.68	241.75	341.26	300.06	323.48	355.56	345.9	186.66	352.5	343.53	335.35	261.76	1361.98	331.58	143.73	130	121.7	195.58	619.48	505.55	488.78	313.23
AtSTARD32	3.32	8.17	7.68	12.3	16.73	19.08	11.5	15.86	9.79	8	14.28	10.68	12.9	11.66	7.95	4.38	12.95	15.68	15.08	15.91	20.05	11.73	15.01	14.86	10.11	14.66	12.8	19.65	12.93	21.55	10.76	11.03	12.55	13.78	15.55	11.26	38.51	18.15	10.55	12.53	12.33	14.55	11.85	18.76	18.31	14.03
AtSTARD33	6.06	3.31	1.23	1.25	1.05	3.31	2.8	1.43	1.38	2.21	1.63	2.66	0.83	1.26	0.81	1.91	1.79	1.89	1.09	2.96	4.2	1.25	0.83	3.29	1.23	1.68	1.66	0.73	1.51	1.11	1.89	1.95	2.55	1.73	1.28	4.06	15.65	1.71	228.46	285.41	551.01	613.33	162.08	72.06	65.45	1.7
AtSTARD34	2.04	35.89	48.6	15.36	3.83	10.21	20.11	18.26	12.21	15.15	17.13	41.24	27.11	33.33	8.31	43.83	60.38	2.86	46.61	77.95	10.03	16.68	9.16	11.83	18.71	6.95	5.34	12.66	11.53	14.1	15.36	2.48	24.08	34.69	23.38	54.43	1.75	35.69	13.86	10.53	10.56	3.66	1.7	1.11	2.4	16.53
AtSTARD35	1585	309.19	169.95	226.66	227.28	336.83	58.08	118.25	144.81	207.18	163.6	218.11	107.5	120.13	297.95	109.25	165.03	417.98	250	151.46	236.6	215.81	326.18	214.26	141.7	328.83	330.18	297.13	240	226.1	196.69	174.06	81.53	72.9	112.83	134.01	176.01	152.61	200.08	265.36	115.95	217.68	777.53	813.05	946.2	191.51

## Sheet: 8-5
Gene	Control Shoot 0 Hour	Cold Shoot 0 Hour	Salt Shoot 0 Hour	Drought Shoot 0 Hour	Wounding Shoot 0 Hour	Heat Shoot 0 Hour	Control Root 0 Hour	Cold Root 0 Hour	Salt Root 0 Hour	Drought Root 0 Hour	Wounding Root 0 Hour	Heat Root 0 Hour	Control Shoot After 1 Hour	Cold Shoot After 1 Hour	Salt Shoot After 1 Hour	Drought Shoot After 1 Hour	Wounding Shoot After 1 Hour	Heat Shoot After 1 Hour	Control Root After 1 Hour	Cold Root After 1 Hour	Salt Root After 1 Hour	Drought Root After 1 Hour	Wounding Root After 1 Hour	Heat Root After 1 Hour	Control Shoot After 3 Hours	Cold Shoot After 3 Hours	Salt Shoot After 3 Hours	Drought Shoot After 3 Hours	Wounding Shoot After 3 Hours	Heat Shoot After 3 Hours	Control Root After 3 Hours	Cold Root After 3 Hours	Salt Root After 3 Hours	Drought Root After 3 Hours	Wounding Root After 3 Hours	Heat Root After 3 Hours	Control Shoot After 4 Hours	Heat Shoot After 4 Hours	Control Root After 4 Hours	Heat Root After 4 Hours	Control Shoot After 6 Hours	Cold Shoot After 6 Hours	Salt Shoot After 6 Hours	Drought Shoot After 6 Hours	Wounding Shoot After 6 Hours	Heat Shoot After 6 Hours	Control Root After 6 Hours	Cold Root After 6 Hours	Salt Root After 6 Hours
AtSTARD1	90.51	90.51	90.51	90.51	90.51	90.51	19.85	19.85	19.85	19.85	19.85	19.85	98.33	107.82	112.92	88.41	87.66	71.71	14.58	16.43	17.82	18.31	12.07	15.65	99.57	97.7	91.27	86.92	84.69	63.52	18.03	10.74	18.25	17.76	14.52	18.67	87.61	85.26	16.08	19.52	86.15	85.8	77.86	104.7	88.03	59.89	14.72	12.1	22.9
AtSTARD2	12.22	12.22	12.22	12.22	12.22	12.22	10.06	10.06	10.06	10.06	10.06	10.06	16.27	18.4	15.4	16.51	13.09	14.71	9.59	13.47	7.82	8.56	9.44	10.16	14.39	19.67	18.6	15.55	15.16	15.73	11.88	10.97	11.2	8.46	7.27	7.87	15.74	14.94	12.11	9.8	23.29	18.35	27.88	17.5	18.25	20.12	10.45	10.58	12.89
AtSTARD4	5.88	5.88	5.88	5.88	5.88	5.88	12.48	12.48	12.48	12.48	12.48	12.48	3.36	7.94	11.71	5.58	16.56	14.53	8.09	8.46	10.16	11.24	5.76	8.09	9.81	8.15	9.72	9.1	6.56	14.98	10.64	5.98	9.43	12.93	7.69	12.02	8.03	14.4	8.39	13.3	12.57	11.03	9.46	12.67	7.08	6.53	8.77	6.85	9.76
AtSTARD6	17.64	17.64	17.64	17.64	17.64	17.64	15.7	15.7	15.7	15.7	15.7	15.7	26.44	26.68	25.63	32.67	17.99	16.86	14.88	15.68	16.7	15.35	11.72	14.67	23.93	24.73	29.06	22.9	24.11	17.43	15.41	10.58	17.1	19.03	12.78	10.29	24.63	18.24	14.97	14.14	27.97	19.35	30.12	22.65	20.16	20.07	16.13	13.84	17.89
AtSTARD7	21.96	21.96	21.96	21.96	21.96	21.96	36.81	36.81	36.81	36.81	36.81	36.81	26.53	37.48	40.87	36.63	5.48	30.13	36.98	38.42	30.14	45.92	33.62	40.78	35.82	30.54	25.04	47.12	34.89	32.86	22.46	27.67	20.2	43.95	30.58	27.9	23.44	52.71	34.62	41.48	33.96	33.72	28.28	38.53	29.63	19.16	34.67	29.29	30.66
AtSTARD8	6.11	6.11	6.11	6.11	6.11	6.11	8.91	8.91	8.91	8.91	8.91	8.91	2.77	3.21	3.54	2.81	8.35	7.3	7.01	8.46	10.14	7.98	3.44	9.94	4.24	2.7	2.99	7.88	6.34	5.51	8.54	7.61	6.66	11.66	5.28	8.16	6.96	5.67	8.76	14.36	10.92	8.76	6.16	6.98	11.01	5.59	6.98	7.82	10.74
AtSTARD10	1.57	1.57	1.57	1.57	1.57	1.57	1.69	1.69	1.69	1.69	1.69	1.69	1.31	1.25	2.24	1.19	1.67	1.66	0.91	1.45	0.81	1.15	1.38	1.8	1.46	1.1	1.84	0.85	1.74	2.31	0.92	1	1.18	1.48	1.18	1.27	0.99	1.93	0.8	1.64	1.43	1.61	2.75	1.17	1.96	2.09	1.12	1.41	1.34
AtSTARD11	40.39	40.39	40.39	40.39	40.39	40.39	12.3	12.3	12.3	12.3	12.3	12.3	53.57	54.09	67.43	56.49	63.31	49.19	13.37	14.58	18.24	16.4	5.95	10.56	49.61	48.14	22.47	46.29	50.96	62.53	8.18	19.99	12.89	16.13	8.08	30.85	62.8	45.4	13.78	22.76	74.33	56.93	47.65	72.06	65.53	63.12	11.75	16.47	16.73
AtSTARD12	119.72	119.72	119.72	119.72	119.72	119.72	68.62	68.62	68.62	68.62	68.62	68.62	141.97	140.67	143.16	105.62	103.46	167.93	79.92	91.79	61.82	72.9	46.21	53.95	125.23	148.41	126.61	133.32	109.98	176.76	64.27	94.24	39.39	73.23	49.55	74.09	138.88	79.74	62.76	55.99	138.99	157.61	143.12	155.18	101.8	120.63	60.66	78.31	36.09
AtSTARD13	191.59	191.59	191.59	191.59	191.59	191.59	47.47	47.47	47.47	47.47	47.47	47.47	233.19	210.74	317.66	247.37	144.42	204.47	40.95	51.52	40.76	55.64	45.73	36.3	213.77	193.93	220.37	192.7	166.01	166.77	48.09	36.21	35.45	58.54	44.6	33.19	224.63	91.94	43.01	24.29	231.5	195.46	240.58	213.37	152.66	144.7	39.57	41.78	39.92
AtSTARD14	17.94	17.94	17.94	17.94	17.94	17.94	13	13	13	13	13	13	22.21	13.87	36.36	12.64	27.15	17.7	21.18	14.1	10.4	8.24	4.23	3.01	19.04	14.54	16.04	8.02	18.63	14.38	12.14	6.52	12.36	16.5	8.17	6.12	26.29	23.08	17.66	7.28	19.12	24.4	19.71	21.2	17.52	16.89	15.91	9.32	6.39
AtSTARD15	251.08	251.08	251.08	251.08	251.08	251.08	49.17	49.17	49.17	49.17	49.17	49.17	330.07	380.55	383.26	282.48	250.63	303.52	47.17	61.48	49.67	60.62	55.41	50.63	285.52	289.22	239.2	308.39	223.44	290.09	50.77	51.52	51.1	62.3	55.74	49.42	340.03	157.39	61.9	45.53	361.14	328.29	265.89	326.79	241.57	206.34	53.03	58.17	47.45
AtSTARD16	12.03	12.03	12.03	12.03	12.03	12.03	10.96	10.96	10.96	10.96	10.96	10.96	14.6	10.79	14.31	10.35	19.81	18.05	12.01	13.33	10.65	9.27	8.35	9.65	14.62	12.64	12.34	9.06	13.09	15.91	10.55	14.44	12.93	13.81	11.75	19.85	15.1	14.95	13.84	11.21	20.07	16.3	19.04	15.83	13.61	17.37	11.03	14.68	12.99
AtSTARD18	13.63	13.63	13.63	13.63	13.63	13.63	10.33	10.33	10.33	10.33	10.33	10.33	12.9	19.45	17.45	16.14	16.11	12.31	8.93	9.66	6.73	9.94	7.11	9.86	11.56	9.26	15.4	9.76	14.25	15.11	7.29	7.93	6.27	7.11	7.58	11.54	10.88	9.53	8.69	15.17	15.15	12.89	14.28	11.94	10.52	9.76	6.42	8.1	12.73
AtSTARD19	27.53	27.53	27.53	27.53	27.53	27.53	10.85	10.85	10.85	10.85	10.85	10.85	32.87	36.21	43.57	36.65	32.2	35.28	6.7	9.37	5.39	2.2	8.52	7.32	36.89	33.29	33.59	37.53	26.19	33.22	8.3	2.87	7.21	5.33	8.03	8.36	33.01	33.53	4.3	6.46	43.84	35.1	34.32	26.85	37.75	35.34	8.69	5.56	16.84
AtSTARD20	2.75	2.75	2.75	2.75	2.75	2.75	25.98	25.98	25.98	25.98	25.98	25.98	2.67	4.92	6.53	3.57	2.34	2.93	42.79	25.27	28.65	35.07	21.17	13.11	2.12	2.31	3.59	6.72	2.09	3.45	38.57	37.72	24.47	29.29	16.77	1.34	5.01	1.92	25.8	4.97	4.33	5.01	8.84	5.8	2.46	2.93	27.86	29.1	32.62
AtSTARD3	80.2	80.2	80.2	80.2	80.2	80.2	85.34	85.34	85.34	85.34	85.34	85.34	90.36	83.61	86.83	74.31	96.08	79.75	88.82	99.15	85.14	83.79	88.24	85.47	77.59	84.79	65.34	77.45	78.78	243.91	91.47	138.44	69.29	90.4	90.74	108.26	81.18	105.53	90.04	118.71	64.9	78.44	91.51	91.53	105.16	89.81	86.96	119.51	62.72
AtSTARD5	84.68	84.68	84.68	84.68	84.68	84.68	184.27	184.27	184.27	184.27	184.27	184.27	79.86	117.24	102.1	92.71	76.48	103	178.8	212.66	174.97	180.42	182.95	188.69	106.45	89.15	101.9	135.68	116.85	149.28	154.34	277.13	109.45	187.74	202	259.07	81.03	70.22	175.4	136.52	101	106.43	112.34	128.34	103.09	108.51	186.29	224.24	96.96
AtSTARD9	85.75	85.75	85.75	85.75	85.75	85.75	127.8	127.8	127.8	127.8	127.8	127.8	94.81	115.88	105.54	87.19	50.06	57.92	103.36	138.62	118.51	116.81	115.26	101.29	90.71	103.64	63.88	107.06	64.77	61.01	123.35	158.87	66.88	129.86	116.54	77.41	68.49	60.42	128.76	118.24	80.03	104.85	57.45	89.07	70.91	83.92	116.27	142.24	58.37
AtSTARD17	43.8	43.8	43.8	43.8	43.8	43.8	70.36	70.36	70.36	70.36	70.36	70.36	56.83	75.34	69.67	73.11	42.81	34.44	73.5	92.71	65.56	107.89	78.6	70.19	53.86	59.51	60.39	73.9	72.16	26.75	80.92	96.55	56.74	96.84	90.59	67.22	49.96	53.48	76.13	73.68	65.2	71.56	66.31	62.54	49.87	55.9	75.3	90.57	66.83
AtSTARD21	153.41	153.41	153.41	153.41	153.41	153.41	237.7	237.7	237.7	237.7	237.7	237.7	175.72	187.56	184.86	152.32	83.82	105.9	198.56	236.55	215.36	147.19	229.34	187.9	127.48	153.1	90.25	145.64	174.18	116.27	227.2	248.86	175.68	222.38	240.91	184.03	115.4	111.4	240.29	189.96	119.28	154.67	104.47	104.05	143.35	104.06	225.76	214.81	191.24
AtSTARD22	79	79	79	79	79	79	84.22	84.22	84.22	84.22	84.22	84.22	91	116.59	82.34	93.5	92.43	52.82	94.18	88.89	74.03	81.99	74.75	67.87	60.39	83.04	97.75	66.68	71.77	76.15	75.25	104.72	76.17	82.48	79.97	118.62	68.61	61.81	82.78	102.43	55.66	87.3	96.25	60.75	66.69	70.46	85.23	112.99	94.72
AtSTARD23	9.53	9.53	9.53	9.53	9.53	9.53	10.72	10.72	10.72	10.72	10.72	10.72	11.3	9.52	11.84	11.01	12.95	12.58	7.69	7.18	10.47	5.73	6.35	10.89	10.77	8.95	8.94	11.27	11.46	14.23	9.12	7.32	8.52	6.81	7.73	12.7	10.98	8.84	7.53	8.89	11.49	8.04	15.03	7.58	8.87	10.8	11.14	11.16	12.33
AtSTARD24	120.04	120.04	120.04	120.04	120.04	120.04	150.37	150.37	150.37	150.37	150.37	150.37	147.3	127.66	157.47	120.34	132.95	86.41	117.63	114.54	107.65	116.67	147.61	79.34	149.42	147.46	178.33	130.96	152.18	72.13	130.91	141.04	134.36	146.93	150.12	68.85	138.49	86.61	142	118.5	113.3	127.49	186.85	150.1	128	144.11	136.36	135.83	150.03
AtSTARD26	22	22	22	22	22	22	44.83	44.83	44.83	44.83	44.83	44.83	28.88	14.88	22.73	21.08	16.23	16.89	59.62	36.87	43.16	46.01	36.13	29.3	22.74	15.53	19.85	23.51	18.31	12.41	41.42	43.32	37.98	50.79	36.62	22.19	28.3	14.09	45.38	24.54	27.76	15.11	28.32	19.37	20.09	26.8	48.34	57.08	53.32
AtSTARD25	229.08	229.08	229.08	229.08	229.08	229.08	321.46	321.46	321.46	321.46	321.46	321.46	224.59	219.91	261.52	246.44	214.53	203.65	304.11	303.87	264.13	254.2	272.83	274.21	241.57	216.7	371.63	253.39	255	104.02	260.28	314.46	226.42	284.44	258.19	150.07	220.19	110.89	313.27	143.84	228.2	191.93	368.29	214.95	191.45	183.42	304.53	279.42	212.42
AtSTARD27	1372.47	1372.47	1372.47	1372.47	1372.47	1372.47	71.92	71.92	71.92	71.92	71.92	71.92	797.49	1901.82	750.22	928.51	290.82	414.11	64.53	78.3	60.52	51.45	75.13	79.63	500.45	1434.96	310.41	564.89	472.05	282.97	71.56	77.63	60.18	67.05	81.38	141.07	384.86	294.17	75.09	190.98	112.6	1134.51	135.42	159.66	120.91	121.13	72.21	72.56	48.55
AtSTARD28	2882.8	2882.8	2882.8	2882.8	2882.8	2882.8	404.13	404.13	404.13	404.13	404.13	404.13	2668.6	2964.13	3399.76	2899.01	1829.17	4073.9	480.01	681.71	421.74	693.18	525.98	544.49	3456.53	3083.34	3421.03	3482.48	3263.54	4271.8	675.56	752.95	478.71	1030.22	750.45	608.03	2940.49	4179.07	424.45	600.06	2927.67	3482.57	2406.32	4127.59	2936.66	2818.64	574.68	551.54	183.98
AtSTARD29	283.53	283.53	283.53	283.53	283.53	283.53	69.66	69.66	69.66	69.66	69.66	69.66	165.94	245.06	207.28	180.91	96.39	260.33	61.99	68.44	54.91	61.82	69.3	59.43	282.61	238.3	133.21	312.14	254.07	254.14	60.93	65.39	43.64	63.98	61.6	81.87	194.19	243.58	61.62	94.75	128.85	219.59	109.99	293.15	177.07	143.48	75.31	53.74	40.08
AtSTARD30	208.7	208.7	208.7	208.7	208.7	208.7	54.82	54.82	54.82	54.82	54.82	54.82	169.47	267.2	197.84	226.12	98.65	519.78	56.93	64.46	72.06	50.56	62.93	90.65	505.93	215.54	475.06	670.81	344.24	469.76	59.22	63.23	87.49	71.4	84.94	146.34	400.97	366.42	68.24	109.04	355.78	212.72	450.47	510.26	291.76	230.54	67.4	69.91	89.1
AtSTARD31	234.12	234.12	234.12	234.12	234.12	234.12	252.88	252.88	252.88	252.88	252.88	252.88	173.48	262.27	223.36	220.99	185.06	211.84	269.19	254.07	321.79	262.93	272.07	252.81	266.8	305.56	346.1	269.92	245.27	242.17	259.96	271.89	305.4	268.14	246.64	212.53	219.04	237.97	292.57	250.01	316.63	387.02	379.32	332.51	270.21	242.52	272.34	233.12	284.22
AtSTARD32	18.24	18.24	18.24	18.24	18.24	18.24	13.01	13.01	13.01	13.01	13.01	13.01	18.36	21.46	26.51	21.07	27.43	27.73	2.99	11.74	12.11	9.24	11.77	11.38	20.12	21.04	27	17.67	26.41	20.54	12.48	10.29	13.21	11.47	11.84	11.61	26.72	23.58	14.79	7.65	28.14	21.92	23.32	25.84	29.35	19.49	11.58	16.11	13.14
AtSTARD33	3.23	3.23	3.23	3.23	3.23	3.23	0.46	0.46	0.46	0.46	0.46	0.46	2.4	1.1	0.86	2.43	1.07	1.81	0.76	1.92	0.62	2.26	1.57	2.7	2.85	2.94	5.17	0.72	0.94	0.62	3.57	0.74	0.98	0.76	1.22	2.71	3.33	1.3	2.89	4.04	2.28	1	1.4	0.75	1.59	1.28	3.32	2.58	4.18
AtSTARD34	6.67	6.67	6.67	6.67	6.67	6.67	23.65	23.65	23.65	23.65	23.65	23.65	8.14	12.7	6.77	11.73	11.04	7.8	22.68	19.25	14.81	28.58	19.17	11.41	13.41	9.05	8.27	13.27	9.42	7.22	17.84	20.02	12.52	24.27	15.05	4.55	11.6	10.9	23.74	15.83	9.84	9.65	8.42	9.22	4.01	11.88	19.43	24.02	6.32
AtSTARD35	300.59	300.59	300.59	300.59	300.59	300.59	70.67	70.67	70.67	70.67	70.67	70.67	109.47	185.26	106.86	503.74	861.51	187.73	57.77	69.23	171.79	445.44	90.53	68.52	135.15	139.96	89.39	232.54	234.73	582.04	78.9	59.29	313.5	147.31	86.97	213.22	135.16	235.82	69.91	201.87	126.6	64.46	122.28	236.69	196.09	150.87	67.69	47.35	391.54
[truncated: 27 more columns]

## Sheet: 8-6
Gene	Seedling Root	Mature Leaf	Young Leaf	SAM	Young Inflorescence	Inflorescence P2	Inflorescence P3	Inflorescence P4	Inflorescence P5	Inflorescence P6	Seed S1	Seed S2	Seed S3	Seed S4	Seed S5
OsSTARD19	318.18	197.93	70.75	90.01	76.99	130.2	106.97	50.27	52.36	82.86	61.13	78.43	21.27	48.5	50.17
OsSTARD1	31.72	9.66	36.88	42.31	21.19	63.62	40.73	45.6	27.25	24.28	62.34	39.11	88.99	88.42	49.26
OsSTARD2	51.28	10.05	14.68	111.94	105.25	232.22	347.68	382.04	260.25	121	126.49	1564.26	464.74	18.54	99.89
OsSTARD17	21.7	13.18	12.56	36.93	21.49	28.89	46.37	31.75	30.1	164.81	39.72	41.58	30.22	72.31	13.2
OsSTARD20	699.97	1337.73	1007.81	592.07	977.77	1432.65	1058.27	913.38	773.33	985.9	844.69	1229.88	1885.86	2180.69	1645
OsSTARD3	31.55	6.35	21.09	58.67	132.77	62.66	100.91	263.56	144.08	46.71	100.42	42.05	32.5	98.04	65.36
OsSTARD4	62.11	21.61	54.7	650.71	484.56	321.69	296.92	316.32	369.2	207.61	115.3	139.51	167.08	63.79	180.46
OsSTARD5	402.32	141.13	78.86	2994.24	1162.58	824.09	753.43	377.5	281.42	192.61	90.7	63.3	103.12	246.88	300.2
OsSTARD6	248.59	194.61	166.25	81.51	229.64	177.22	175.73	233.05	367.17	480.46	630.84	537.11	284.23	89.05	210.93
OsSTARD7	119.79	1342.78	841.5	3870.27	5005.41	3237.84	3903.74	3471.98	1960.56	1451.42	1588.08	1347.76	1230.42	1747.68	2853.6
OsSTARD8	26.65	6.85	15.33	36.95	32.58	16.34	20.89	49.8	22.89	15.78	37.72	18.46	11.78	5.88	6.19
OsSTARD21	10.38	17.25	2.92	6.28	3.72	5.01	10.13	4.84	10.93	16.97	7.35	40.23	6.16	47.79	34.64
OsSTARD24	2.78	1.81	4.85	10.66	2.66	1.95	3.54	2.12	1.84	2.07	2.42	2.81	3.04	78.06	52.72
OsSTARD9	23.48	16.9	11.36	57.54	90.99	7.44	36.96	124.39	63.64	8.88	27.48	14.89	8.34	57.78	29.92
OsSTARD10	68.24	1860.01	823.2	3468	4183.55	4721.12	3592.24	3158.2	3345.46	1402.88	1343.72	1301	1004.21	874.28	964.23
OsSTARD11	197.01	136.15	334.74	1327.28	1074.56	807.42	647.58	604.27	383.49	373	274.93	828.71	605.42	412.9	641.7
OsSTARD18	2014.78	945.18	1252.33	1347.13	1747.01	1159.89	1550.18	1545.26	1349.49	1276.31	1243.42	1430.1	1144.85	563.85	513.38
OsSTARD12	117.43	721.57	537.37	1035.54	2871.36	2245.7	3704.97	3892.36	1789.75	2227.44	1168.83	839.04	427.68	383.21	479.93
OsSTARD16	1913.7	3049.14	3278.9	1806.21	2615.08	2963.85	2558.2	1815.4	2143.95	2178.46	2319.92	2481.82	2382.43	2205.88	2263.14
OsSTARD13	601.26	289.32	521.91	5817.5	2036.37	2236.44	2224.62	1615.13	2616.31	982.13	655.22	806.15	502.14	421.69	273.76
OsSTARD14	17.71	19	24.98	1189.35	1981.55	1192.18	1200.59	957.15	305.53	161.27	191.79	158.65	106.92	68.54	99.45
OsSTARD25	605.57	43.86	19.8	154.51	254.19	401.87	869.83	1225.21	2815.14	328.88	177.78	50.77	91.09	80.94	43.17
OsSTARD15	1539.57	274.65	199.72	6493.86	2978.13	3188.07	2105.76	1621.8	1706.33	394.79	292.35	173.37	246.43	430.2	569.27

## Sheet: 8-7
Gene	Control_Shoot	Control_Root	Drought_Shoot	Drought_Root	Salt_Shoot	Salt_Root	Cold_Shoot	Cold_Root
OsSTARD19	99.85	99.85	283.68	283.68	294.88	294.88	168.01	168.01
OsSTARD1	48.64	48.64	26.48	26.48	23.09	23.09	8.08	8.08
OsSTARD2	13.07	13.07	8.51	8.51	18.28	18.28	32.66	32.66
OsSTARD17	31.2	31.2	25.56	25.56	33.65	33.65	20.74	20.74
OsSTARD20	1304.91	1304.91	877.22	877.22	1049.24	1049.24	1062.88	1062.88
OsSTARD3	69.59	69.59	76.59	76.59	65.21	65.21	48.06	48.06
OsSTARD4	147.86	147.86	109.49	109.49	138.7	138.7	175.53	175.53
OsSTARD5	2348.04	2348.04	2549.06	2549.06	2761.84	2761.84	2092.4	2092.4
OsSTARD6	140.88	140.88	401.44	401.44	423.91	423.91	76.48	76.48
OsSTARD7	1679.8	1679.8	1164.26	1164.26	1693.1	1693.1	1460.85	1460.85
OsSTARD8	38.84	38.84	1.96	1.96	9.3	9.3	11.07	11.07
OsSTARD21	9.56	9.56	14.29	14.29	3.27	3.27	8	8
OsSTARD24	1.6	1.6	1.6	1.6	1.57	1.57	2.33	2.33
OsSTARD9	17.99	17.99	12.56	12.56	9.55	9.55	17.78	17.78
OsSTARD10	2200.39	2200.39	1267.14	1267.14	1572.73	1572.73	1693.13	1693.13
OsSTARD11	345.09	345.09	177.58	177.58	207.57	207.57	233.07	233.07
OsSTARD18	1708.81	1708.81	1423.38	1423.38	1359.3	1359.3	1670.27	1670.27
OsSTARD12	497.4	497.4	974.28	974.28	864.89	864.89	458.17	458.17
OsSTARD16	1928.3	1928.3	2988.26	2988.26	2935.34	2935.34	1881.2	1881.2
OsSTARD13	1672.05	1672.05	1240.91	1240.91	1615.6	1615.6	1458.79	1458.79
OsSTARD14	197.19	197.19	140.65	140.65	160.14	160.14	160.43	160.43
OsSTARD25	383.7	383.7	393.88	393.88	334.12	334.12	216.22	216.22
OsSTARD15	1188.72	1188.72	550.35	550.35	681.8	681.8	986.18	986.18

## Sheet: 8-8
VvSTARD1	12h			VvSTARD1	24h
	Average relative expression	Standard error	Significance		Average relative expression	Standard error	Significance
Control	1	0	b	Control	1	0	f
ABA	0.271414	0.16206	b	ABA	0.0539353	0.01757	f
MeJA	0.387106	0.26971	b	MeJA	422.54	31.2288	b
SA	2.7128	0.12782	b	SA	15.3797	1.7397	e
IAA	3.20112	2.13265	b	IAA	59.1269	11.0819	d
GA3	1.37744	1.35722	b	GA3	157.389	98.8053	c
PEG	0.290755	0.18005	b	PEG	0.24868	0.24468	f
NaCl	29.3546	2.44859	a	NaCl	643.527	30.1954	a
4℃	7.97432	2.35105	b	4℃	0.0149005	0.00352	f
VvSTARD2	12h			VvSTARD2	24h
	Average relative expression	Standard error	Significance		Average relative expression	Standard error	Significance
Control	1	0	c	Control	1	0	f
ABA	0.318975	0.13154	c	ABA	3.18919	1.582	f
MeJA	0.475071	0.15749	c	MeJA	11302	3993.89	c
SA	58.4621	20.6121	bc	SA	894.127	480.87	d
IAA	325.038	30.8888	a	IAA	11739.1	4831.88	c
GA3	56.3831	10.8804	bc	GA3	21710.5	6067.67	b
PEG	0.19123	0.1548	c	PEG	15.7599	10.6165	e
NaCl	187.204	10.5585	ab	NaCl	55408	6840.9	a
4℃	52.7505	4.89515	bc	4℃	356.847	183.902	d
VvSTARD3	12h			VvSTARD3	24h
	Average relative expression	Standard error	Significance		Average relative expression	Standard error	Significance
Control	1	0	b	Control	1	0	d
ABA	0.0861517	0.05337	b	ABA	0.350548	0.01303	d
MeJA	1.44112	0.60993	b	MeJA	16.2889	3.94607	bc
SA	1.21019	0.35017	b	SA	0.946614	0.66303	d
IAA	2.54827	1.0352	ab	IAA	9.25358	2.10275	c
GA3	1.09886	0.18473	b	GA3	22.2649	3.16482	b
PEG	0.66542	0.12685	b	PEG	1.03886	0.15266	d
NaCl	5.99734	4.53855	ab	NaCl	143.326	22.1773	a
4℃	7.50531	6.11124	a	4℃	0.544283	0.35784	d
VvSTARD4	12h			VvSTARD4	24h
	Average relative expression	Standard error	Significance		Average relative expression	Standard error	Significance
Control	1	0	b	Control	1	0	e
ABA	0.829824	0.54936	b	ABA	0.0845997	0.03927	e
MeJA	19.7937	6.16928	a	MeJA	294.059	132.684	b
SA	8.67762	3.89064	b	SA	46.0804	20.8256	d
IAA	2.05859	0.97933	b	IAA	198.427	138.256	c
GA3	0.193179	0.08539	b	GA3	285.788	132.143	b
PEG	0.963845	0.60537	b	PEG	0.389374	0.04397	e
NaCl	3.19028	2.70297	b	NaCl	3309.14	146.955	a
4℃	5.40145	3.29255	b	4℃	1.05783	0.47166	e
VvSTARD5	12h			VvSTARD5	24h
	Average relative expression	Standard error	Significance		Average relative expression	Standard error	Significance
Control	1	0	b	Control	1	0	e
ABA	0.446057	0.09527	b	ABA	0.311841	0.13098	e
MeJA	6.2226	2.69968	b	MeJA	70.0189	22.4805	c
SA	7.49509	0.95736	ab	SA	29.8773	5.94606	d
IAA	9.74539	5.17693	ab	IAA	78.9509	33.3556	c
GA3	1.5107	0.66075	b	GA3	145.106	46.9761	b
PEG	0.498654	0.07672	b	PEG	0.286283	0.09874	e
NaCl	23.6527	6.61865	a	NaCl	880.706	31.3074	a
4℃	10.6971	3.11593	ab	4℃	0.509931	0.11421	e
VvSTARD6	12h			VvSTARD6	24h
	Average relative expression	Standard error	Significance		Average relative expression	Standard error	Significance
Control	1	0	c	Control	1	0	c
ABA	0.0908601	0.04772	c	ABA	0.153747	0.0569	c
MeJA	1.01082	0.34408	c	MeJA	49.4864	18.9125	c
SA	1.2474	0.74371	c	SA	78.0122	34.0372	bc
IAA	11.4709	2.80021	a	IAA	13.2291	1.99365	c
GA3	2.56719	0.90005	bc	GA3	366.327	51.1584	a
PEG	0.68701	0.39117	c	PEG	0.0883818	0.02679	c
NaCl	9.06315	1.61569	ab	NaCl	210.731	64.9093	b
4℃	1.48895	0.14822	bc	4℃	0.617082	0.07258	c
VvSTARD7	12h			VvSTARD7	24h
	Average relative expression	Standard error	Significance		Average relative expression	Standard error	Significance
Control	1	0	c	Control	1	0	f
ABA	14.0627	1.64926	bc	ABA	27.8881	7.28038	e
MeJA	262.288	20.496	a	MeJA	15554.7	3268.61	b
SA	301.555	6.56645	a	SA	1723.24	1061.37	d
IAA	10.4691	3.53137	c	IAA	5294.44	1916.76	c
GA3	119.298	10.9057	b	GA3	69870.2	4141.74	a
PEG	0.721604	0.36168	c	PEG	3.52938	0.39368	f
NaCl	103.458	20.4165	bc	NaCl	92793.7	4237.92	a
4℃	105.772	20.2131	bc	4℃	5.75997	2.19886	f
VvSTARD8	12h			VvSTARD8	24h
	Average relative expression	Standard error	Significance		Average relative expression	Standard error	Significance
Control	1	0	c	Control	1	0	f
ABA	1.62901	0.45573	c	ABA	1.40348	0.59709	f
MeJA	31.8998	6.55686	b	MeJA	184.028	79.3317	d
SA	38.3263	4.48595	b	SA	22.7034	5.40526	e
IAA	4.02819	2.04412	c	IAA	507.478	86.4104	c
GA3	1.20928	0.4644	c	GA3	6066.72	613.594	a
PEG	0.339964	0.0627	a	PEG	6.40664	1.08865	f
NaCl	40.5268	2.73629	a	NaCl	3284.05	406.365	b
4℃	4.81193	2.03624	c	4℃	1.47981	0.58309	f
VvSTARD9	12h			VvSTARD9	24h
	Average relative expression	Standard error	Significance		Average relative expression	Standard error	Significance
Control	1	0	c	Control	1	0	d
ABA	0.738665	0.32352	c	ABA	0.214416	0.11364	d
MeJA	3.87334	1.90165	c	MeJA	74.5785	17.5282	c
SA	28.0591	4.87835	c	SA	97.1431	14.5953	bc
IAA	5.27607	2.23568	c	IAA	115.734	73.7913	bc
GA3	33.8773	1.59616	c	GA3	211.677	23.1432	b
PEG	0.949771	0.4737	c	PEG	2.27726	0.78952	d
NaCl	13.7775	7.40427	b	NaCl	442.018	38.4849	a
4℃	99.3981	16.1396	a	4℃	0.636684	0.29149	d
VvSTARD10	12h			VvSTARD10	24h
	Average relative expression	Standard error	Significance		Average relative expression	Standard error	Significance
Control	1	0	c	Control	1	0	d
ABA	0.553136	0.36438	c	ABA	0.292319	0.16095	d
MeJA	1.38789	1.26102	c	MeJA	185.69	98.4217	b
SA	20.6405	3.26596	b	SA	66.0515	49.6501	c
IAA	8.53299	2.7665	bc	IAA	72.747	30.2896	c
GA3	1.42735	0.8863	c	GA3	71.1837	31.2292	c
PEG	0.338838	0.16247	c	PEG	0.779327	0.01598	d
NaCl	34.7849	27.9083	a	NaCl	448.649	40.1998	a
4℃	29.5662	16.6353	a	4℃	7.89706	1.21158	d
VvSTARD11	12h			VvSTARD11	24h
	Average relative expression	Standard error	Significance		Average relative expression	Standard error	Significance
Control	1	0	a	Control	1	0	d
ABA	0.295056	0.09956	a	ABA	0.0830391	0.03714	d
MeJA	1.85186	1.38402	a	MeJA	20.4667	5.32199	c
SA	1.31395	0.36209	a	SA	1.46335	0.44872	d
IAA	2.04687	0.6026	a	IAA	28.8408	6.7762	c
GA3	0.503972	0.06935	a	GA3	95.6146	40.1712	b
PEG	0.198812	0.01235	a	PEG	0.254835	0.09425	d
NaCl	1.11233	0.32225	a	NaCl	431.418	33.3593	a
4℃	2.75332	0.89901	a	4℃	0.223781	0.00334	d
VvSTARD12	12h			VvSTARD12	24h
	Average relative expression	Standard error	Significance		Average relative expression	Standard error	Significance
Control	1	0	c	Control	1	0	d
ABA	0.504448	0.39153	c	ABA	0.153925	0.00313	d
MeJA	8.51009	2.0764	b	MeJA	274.136	39.1874	b
SA	17.4827	3.45874	b	SA	61.4322	25.7913	c
IAA	5.45465	1.95862	b	IAA	147.188	65.8389	bc
GA3	4.76594	1.07792	b	GA3	225.789	29.1188	b
PEG	0.516278	0.33088	c	PEG	0.285878	0.17592	d
NaCl	59.9118	17.3312	a	NaCl	931.99	84.4496	a
4℃	4.34493	2.83668	b	4℃	0.0532541	0.05236	d
VvSTARD13	12h			VvSTARD13	24h
	Average relative expression	Standard error	Significance		Average relative expression	Standard error	Significance
Control	1	0	d	Control	1	0	d
ABA	1.13142	1.3903	d	ABA	0.41291	0.09016	d
MeJA	21.9863	5.81657	b	MeJA	175.165	24.9243	b
SA	13.9809	6.34326	c	SA	18.5803	6.69488	c
IAA	10.3359	4.53378	c	IAA	28.6368	3.12935	c
GA3	2.68442	1.33712	d	GA3	81.1076	8.83629	bc
PEG	0.603596	0.4689	d	PEG	0.515473	0.28559	d
NaCl	93.5192	26.7058	a	NaCl	675.594	26.4131	a
4℃	1.43901	0.47063	d	4℃	1.00796	0.75059	d
VvSTARD14	12h			VvSTARD14	24h
	Average relative expression	Standard error	Significance		Average relative expression	Standard error	Significance
Control	1	0	c	Control	1	0	c
ABA	1.14979	0.52228	c	ABA	2.15299	1.38119	c
MeJA	1.30685	0.39854	c	MeJA	73.3864	20.8341	bc
SA	11.3961	5.3734	b	SA	83.0179	35.9316	bc
IAA	2.921	1.72457	c	IAA	320.793	20.526	b
GA3	1.41534	0.56316	c	GA3	754.938	40.5162	ab
PEG	1.16177	0.58334	c	PEG	1.19751	0.65187	c
NaCl	24.1321	7.24389	a	NaCl	793.75	88.6737	a
4℃	4.86116	2.08241	c	4℃	1.78274	1.27155	c
VvSTARD15	12h			VvSTARD15	24h
	Average relative expression	Standard error	Significance		Average relative expression	Standard error	Significance
Control	1	0	cd	Control	1	0	d
ABA	0.287928	0.14641	d	ABA	0.335648	0.04269	d
MeJA	1.16683	0.13082	cd	MeJA	152.445	45.5975	ab
SA	9.63888	3.12324	bc	SA	106.217	20.5351	bc
IAA	13.1425	3.68713	ab	IAA	71.1556	20.1484	cd
GA3	3.88187	3.05929	cd	GA3	124.693	49.3536	ab
PEG	0.357084	0.17229	d	PEG	1.21625	0.25734	d
NaCl	14.1917	6.5018	ab	NaCl	209.117	38.7082	a
4℃	20.1939	2.1673	a	4℃	4.16993	0.0236	d
VvSTARD16	12h			VvSTARD16	24h
	Average relative expression	Standard error	Significance		Average relative expression	Standard error	Significance
Control	1	0	d	Control	1	0	d
ABA	1.18339	0.213806	d	ABA	0.085253	0.0220645	d
MeJA	0.167557	0.156885	d	MeJA	39.1949	19.416	bc
SA	6.41696	5.76649	bc	SA	128.944	23.6202	a
IAA	7.24186	1.05261	b	IAA	17.939	13.6229	cd
GA3	1.52493	1.22078	cd	GA3	10.3039	1.56137	d
PEG	0.978935	0.337292	d	PEG	0.688703	0.0441601	d
NaCl	9.35925	0.746974	ab	NaCl	48.1375	12.727	b
4℃	12.6551	4.85692	a	4℃	1.02615	0.450923	d
VvSTARD17	12h			VvSTARD17	24h
	Average relative expression	Standard error	Significance		Average relative expression	Standard error	Significance
Control	1	0	b	Control	1	0	d
ABA	0.958149	0.764678	b	ABA	1.71534	1.35868	d
MeJA	0.0746758	0.0576094	b	MeJA	12436.7	11654.2	a
SA	11.1039	6.58744	ab	SA	761.93	895.554	c
IAA	27.6341	35.4757	a	IAA	753.732	841.376	c
GA3	1.93931	0.644136	b	GA3	3134.82	3716.71	c
PEG	0.539184	0.109641	b	PEG	6.70836	6.33139	d
NaCl	17.5335	11.3748	ab	NaCl	2559.68	2452.57	b
4℃	7.42219	3.8969	ab	4℃	9.66681	1.37264	d
VvSTARD18	12h			VvSTARD18	24h
	Average relative expression	Standard error	Significance		Average relative expression	Standard error	Significance
Control	1	0	a	Control	1	0	c
ABA	0.680053	0.721553	a	ABA	0.214155	0.247759	c
MeJA	0.0371084	0.0367976	a	MeJA	92.873	65.7239	a
SA	1.16775	1.05561	a	SA	112.73	173.435	a
IAA	1.14048	0.918027	a	IAA	12.3575	9.19756	bc
GA3	0.226031	0.198013	a	GA3	20.6115	13.7889	b
PEG	0.643153	0.591631	a	PEG	1.36476	0.753342	c
NaCl	2.19746	1.90491	a	NaCl	30.4516	21.2415	b
4℃	1.4224	1.158	a	4℃	3.13388	1.6661	c
VvSTARD19	12h			VvSTARD19	24h
	Average relative expression	Standard error	Significance		Average relative expression	Standard error	Significance
Control	1	0	c	Control	1	0	d
ABA	0.597297	0.407336	c	ABA	1.19259	0.11164	d
MeJA	0.549814	0.309117	c	MeJA	636.532	207.13	a
SA	18.155	31.2087	bc	SA	548.858	565.035	ab
IAA	38.3253	11.5341	b	IAA	70.8958	97.5657	c
GA3	14.4241	4.90933	bc	GA3	26.7542	7.00065	c
PEG	0.308276	0.0334976	c	PEG	2.1206	2.15164	d
NaCl	155.923	23.5412	a	NaCl	203.535	199.3	bc
4℃	25.0932	8.04125	bc	4℃	0.345627	0.322723	d
VvSTARD20	12h			VvSTARD20	24h
	Average relative expression	Standard error	Significance		Average relative expression	Standard error	Significance
Control	1	0	b	Control	1	0	b
ABA	1.59832	1.37313	b	ABA	5.88036	2.47436	b
MeJA	0.329229	0.13133	b	MeJA	38.3693	64.6237	a
SA	0.560194	0.280493	b	SA	33.243	19.6509	a
IAA	0.722756	0.782614	b	IAA	8.93637	8.96904	b
GA3	1.15119	1.61163	b	GA3	7.10604	0.493437	b
PEG	1.9071	2.56236	b	PEG	0.527509	0.127778	b
NaCl	0.583476	0.369207	b	NaCl	1.2064	0.627882	b
4℃	8.15986	5.76788	a	4℃	0.797952	0.438159	b
VvSTARD21	12h			VvSTARD21	24h
	Average relative expression	Standard error	Significance		Average relative expression	Standard error	Significance
Control	1	0	ab	Control	1	0	b
ABA	0.459297	0.384342	b	ABA	12.2464	4.74637	b
MeJA	4.24136	2.9156	ab	MeJA	370.471	616.575	a
SA	4.09919	3.14475	ab	SA	85.9187	37.6695	ab
IAA	1.77772	2.1386	ab	IAA	17.4182	23.3019	b
GA3	6.13786	8.45156	a	GA3	9.90794	3.83849	b
PEG	0.711873	1.08223	ab	PEG	2.94994	1.73996	b
NaCl	5.97102	5.13985	ab	NaCl	0.869352	0.598458	b
4℃	1.32692	1.28421	ab	4℃	1.92768	0.402994	b
VvSTARD22	12h			VvSTARD22	24h
	Average relative expression	Standard error	Significance		Average relative expression	Standard error	Significance
Control	1	0	b	Control	1	0	b
ABA	1.60058	1.13665	b	ABA	1.23965	0.259643	b
MeJA	1.93687	1.3237	b	MeJA	11.9064	20.0151	a
SA	3.53661	2.07025	ab	SA	8.84043	6.47051	a
IAA	11.0523	12.0849	a	IAA	0.708091	0.542741	b
GA3	1.76986	1.31922	b	GA3	0.446714	0.182129	b
PEG	0.869325	0.628074	b	PEG	0.42264	0.200071	b
NaCl	5.72362	4.39029	ab	NaCl	0.745156	0.502483	b
4℃	1.37027	1.05921	b	4℃	0.529396	0.184349	b
VvSTARD23	12h			VvSTARD23	24h
	Average relative expression	Standard error	Significance		Average relative expression	Standard error	Significance
Control	1	0	a	Control	1	0	d
ABA	0.166631	0.148912	a	ABA	27.6597	15.817	c
MeJA	0.238842	0.160462	a	MeJA	2829.46	4843.56	a
SA	0.721781	0.395688	a	SA	42.0884	20.4197	c
IAA	0.367408	0.333785	a	IAA	102.305	75.9293	b
GA3	0.0493553	0.0399167	a	GA3	45.7961	11.3002	c
PEG	0.0598703	0.0645792	a	PEG	2.20711	1.98291	d
NaCl	0.524034	0.467897	a	NaCl	1.44679	0.450169	d
4℃	0.501226	0.425278	a	4℃	0.173952	0.0296362	d

## Sheet: 8-9
	qRT-PCR in transgenic tomato leaves
	treatment times(h)	Average relative expression	Standard error	Significance
WT	ck	1	0
	12	1.39401	0.971437
	24	0.826333	0.155592
#1	ck	1	0
	12	2.67558	1.3547	*
	24	75.505	17.7994	**
#2	ck	1	0
	12	4.67895	1.23953	*
	24	92.4239	16.1993	**
#4	ck	1	0
	12	2.98355	1.65344	*
	24	88.9573	14.2864	**
	Relative electrical conductivity (%) of transgenic tomato leaves
treatment	lines	average value	Standard error	Significance
Control	WT	31.8849	1.19884
	#1	30.8194	0.74644
	#2	30.4697	0.879179
	#4	30.5368	0.570258
NaCl	WT	48.89	1.19011
	#1	40.1473	1.4199	**
	#2	42.1441	0.967329	**
	#4	40.1475	1.43706	**
	Malondialdehyde content (mmol.g-1) of transgenic tomato leaves
treatment	lines	average value	Standard error	Significance
Control	WT	0.309603	0.00401609
	#1	0.293117	0.00727846
	#2	0.295443	0.00905598
	#4	0.285127	0.00834419
NaCl	WT	0.51271	0.0127471
	#1	0.36304	0.0147343	**
	#2	0.389487	0.00625501	**
	#4	0.363413	0.00942976	**
	Proline content (μg.g-1) of transgenic tomato leaves
treatment	lines	average value	Standard error	Significance
Control	WT	149.337	1.77849
	#1	150.38	2.08442
	#2	151.685	1.73223
	#4	149.794	1.19445
NaCl	WT	149.779	2.93497
	#1	175.435	2.93331	**
	#2	182.406	2.07031	**
	#4	171.984	2.68629	**
